# Supplementary material
Source: Springer Nature journal article supplement (https://www.springermedizin.de/resource/supplementary/13013_2006_24_MOESM6_ESM.pdf/9631026)

$r = -0,34$   $p < 0,05$

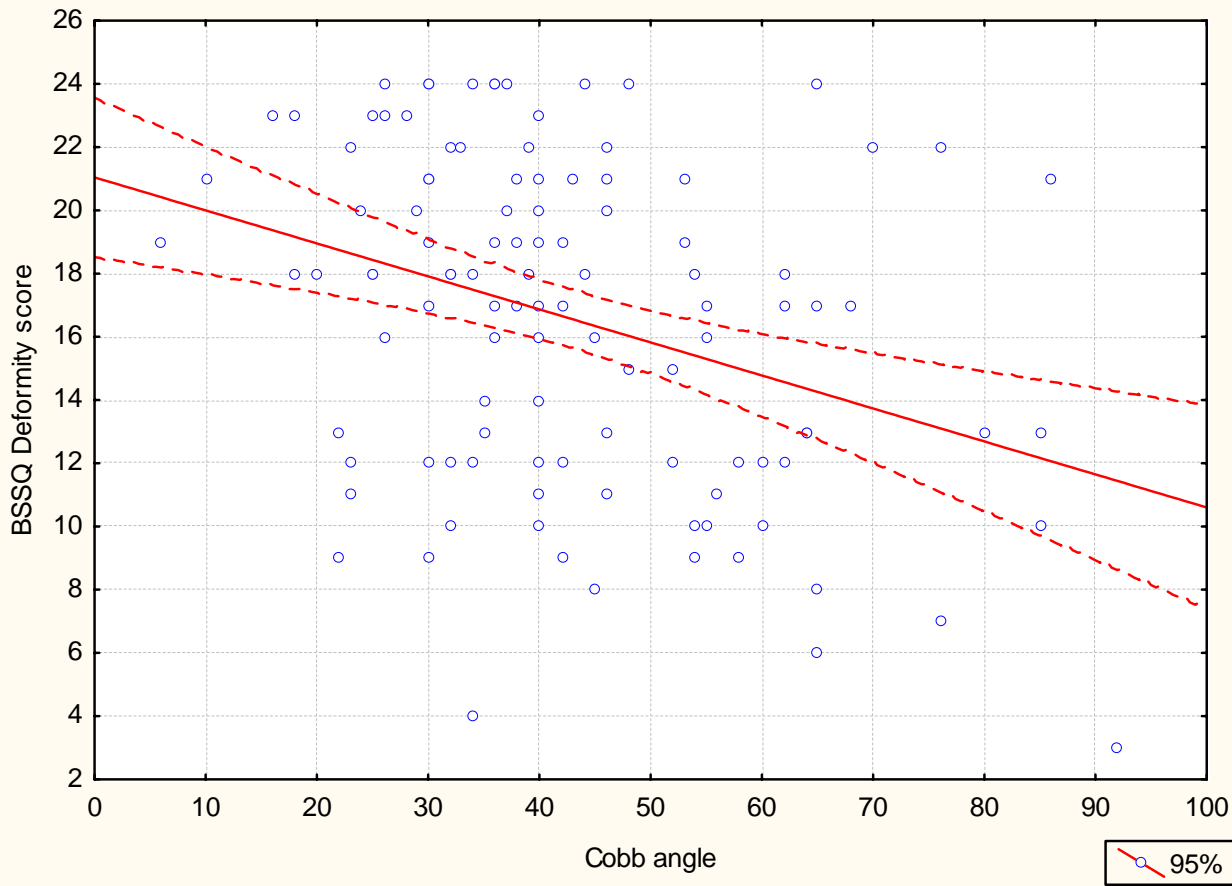

Supplement: MOESM6 [file 9631026]
